# Supplementary material for: Synthesis, photophysical and electroluminescent properties of iridium(iii) complexes with 2-aryl-thiazole and oxadiazol-substituted amide derivative ligands
Source: Royal Society of Chemistry journal article supplement (doi:10.1039/c8nj05370g), 2019-01-01
Supplement: c8nj05370g1.pdf [file c8nj05370g1.pdf]

## Supporting information

### Synthesis, Photophysical and Electroluminescent Properties of Iridium(III) Complexes with 2-Aryl-thiazole and Oxadiazol-substituted Amide Derivative Ligands

Jiali Yang <sup>a</sup>, Fuli Zhang <sup>b,\*</sup>, Xiaobin Dong <sup>b</sup>, Bo Yu <sup>b</sup>, Mengyang Zhang <sup>b</sup>, Donghui Wei <sup>c</sup>, Zhongyi Li <sup>b</sup>, Bin Wei <sup>a,\*</sup>, Chi Zhang <sup>b</sup>, Suzhi Li <sup>b</sup>, Guangxiu Cao <sup>b</sup> and Bin Zhai <sup>b,\*</sup>

<sup>a</sup> Engineering Technical Research Centre for Optoelectronic Functional Materials of Henan Province, Key Laboratory of Biomolecular Recognition and Sensing of Henan Province, College of Chemistry and Chemical Engineering, Shangqiu Normal University, Shangqiu 476000, P. R. China.

<sup>b</sup> School of Materials Science and Engineering, Shanghai University, Shanghai 200072, P. R. China.

<sup>c</sup> College of Chemistry and Molecular Engineering, Zhengzhou University, Zhengzhou 450001, P. R. China.

E-mail: zzu\_zfl@126.com; bwei@shu.edu.cn; zhaibin\_1978@163.com (Bin Zhai)

#### Contents:

1. The enlargement of absorption spectra from 325 nm to 600 nm of complexes **1–3** in CH<sub>3</sub>CN solution.....S2
2. Photoluminescence lifetimes of complexes **1–3** in CH<sub>3</sub>CN solution.....S2
3. Photoluminescence lifetimes of complexes **1–3** in Dictrz film.....S3
4.  $\eta_c$ - $L$ - $\eta_p$  characteristics of OLEDs with a structure of ITO/HAT-CN (20 nm)/NPB (10 nm)/TCTA (20 nm)/Dictrz: x% complexes **1** (a), **2** (b) or **3** (c) (10 nm)/TmPyPB (40 nm)/Liq (1 nm)/Al (100 nm), x = 1, 5 or 10.....S3

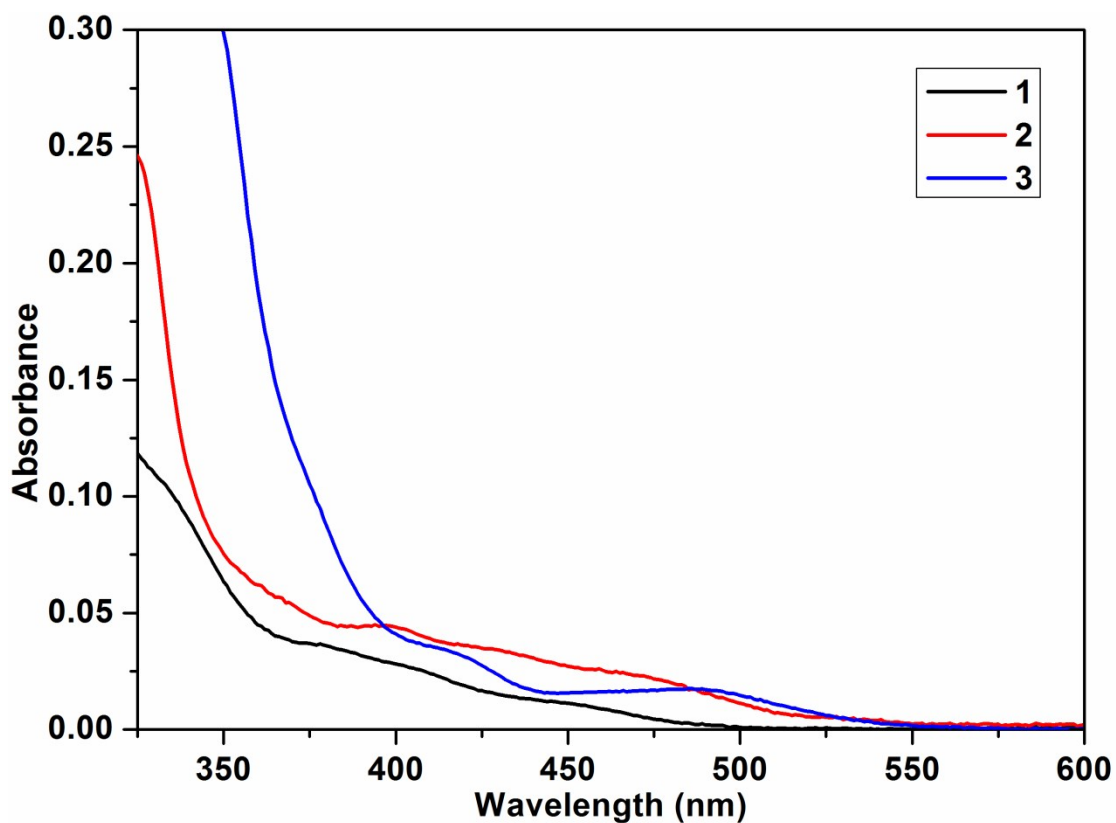

**Fig. S1.** The enlargement of absorption spectra from 325 nm to 600 nm of complexes 1–3 in CH<sub>3</sub>CN solution.

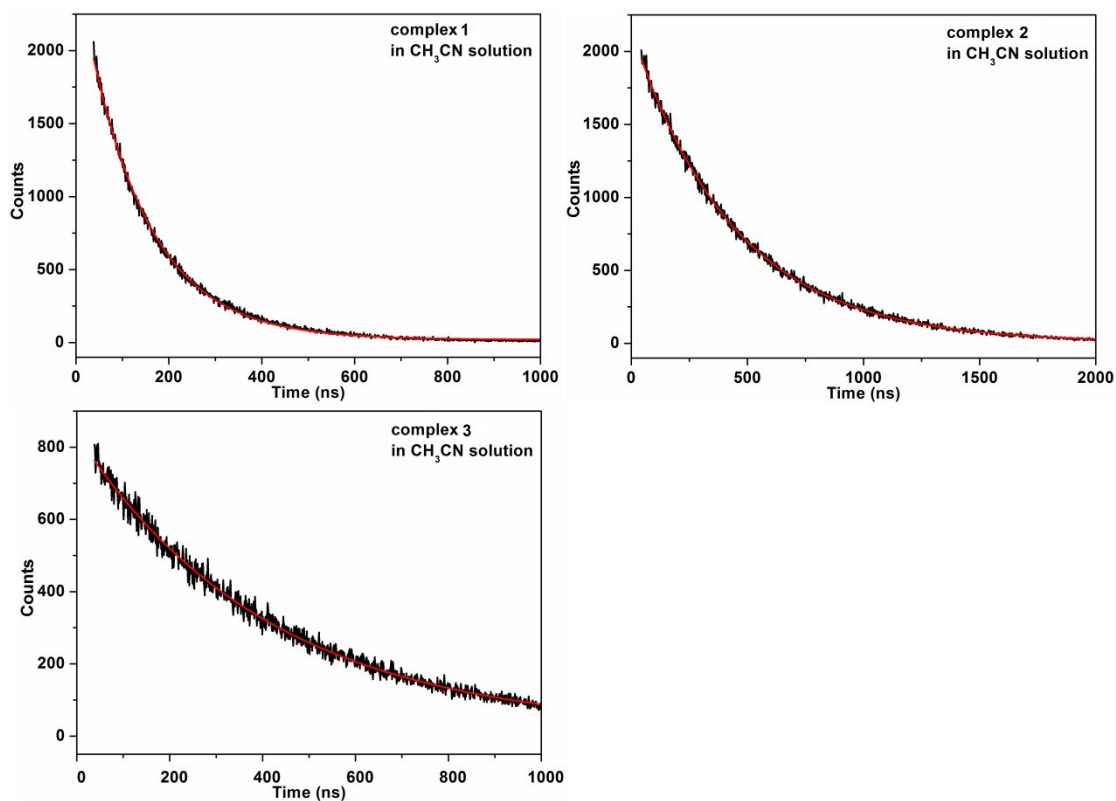

**Fig. S2.** Photoluminescence lifetimes of complexes 1–3 in CH<sub>3</sub>CN solution.

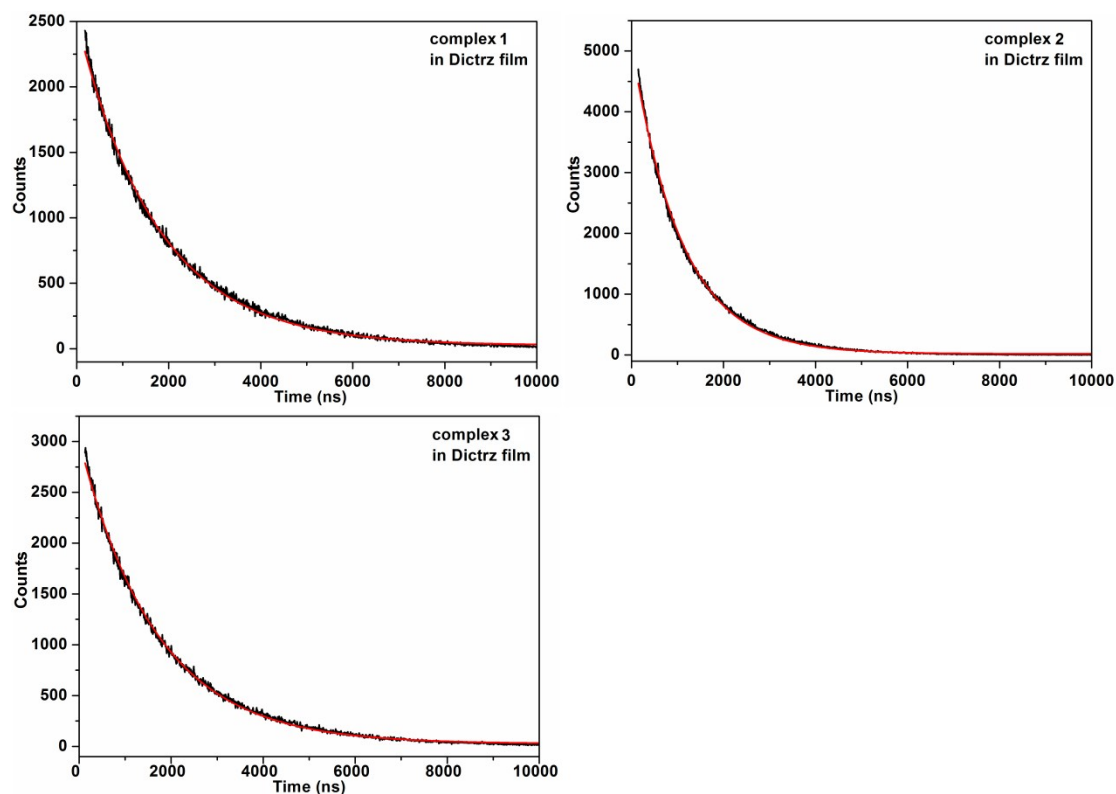

Fig. S3. Photoluminescence lifetimes of complexes 1–3 in Dicitrz film.

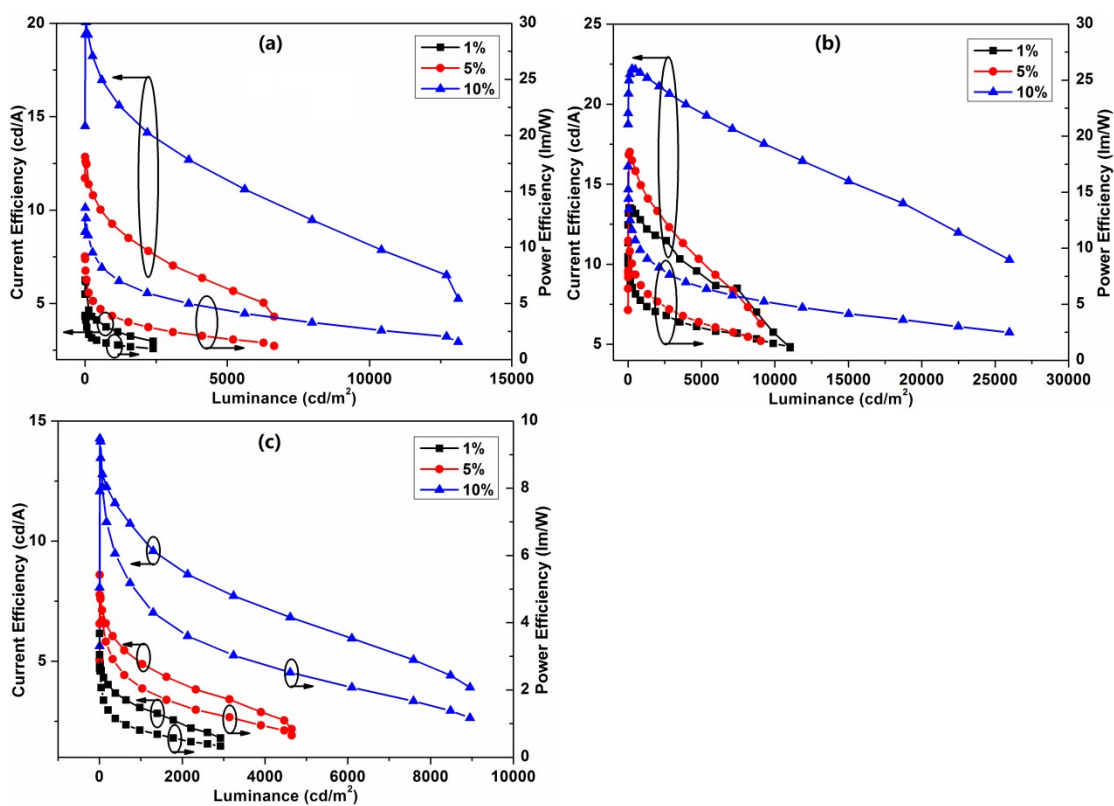

Fig. S4.  $\eta_c$ - $L$ - $\eta_p$  characteristics of OLEDs with a structure of ITO/HAT-CN (20 nm)/NPB (10 nm)/TCTA (20 nm)/Dicitrz: x% complex 1 (a), 2 (b) or 3 (c) (10 nm)/TmPyPB (40 nm)/Liq (1 nm)/Al (100 nm), x = 1, 5 or 10.
